# Supplementary material for: Development of Brain EEG Connectivity across Early Childhood: Does Sleep Play a Role?
Source: MDPI journal article supplement (doi:10.3390/brainsci3041445), 2013-11-12
Supplement: s1 [file s1]

## Supplementary Information

**Figure S1.** Temporal dynamics of inter-hemispheric occipital coherence across the night. **Left column:** Average coherence spectra as percentage change of last relative to the first non-REM sleep episode (last non-REM sleep episode was determined individually in each subject and ranged from the 6th to 10th non-REM sleep episode, see Table 1). For last non-REM sleep episodes, only data were included which contained at least twenty 30-s epochs. Significant changes across the night are represented as dots at the bottom of the figure (bootstrap statistics, 0.2-Hz frequency resolution). Red dots refer to significant increases in coherence from the first to the last non-REM episode and black dots refer to significant decreases ( $p < 0.05$ ). **Right column:** Temporal evolution of coherence across the night representing all non-REM sleep episodes (numbered). Spectra are expressed as a percentage change from the first non-REM sleep episode. Significant coherence changes across the night are represented as red (coherence increase) or black dots (decrease,  $p < 0.05$ , repeated measures ANOVA, factor “non-REM sleep episode”). Data are shown for the maximal number of non-REM sleep episodes completed by all subjects.

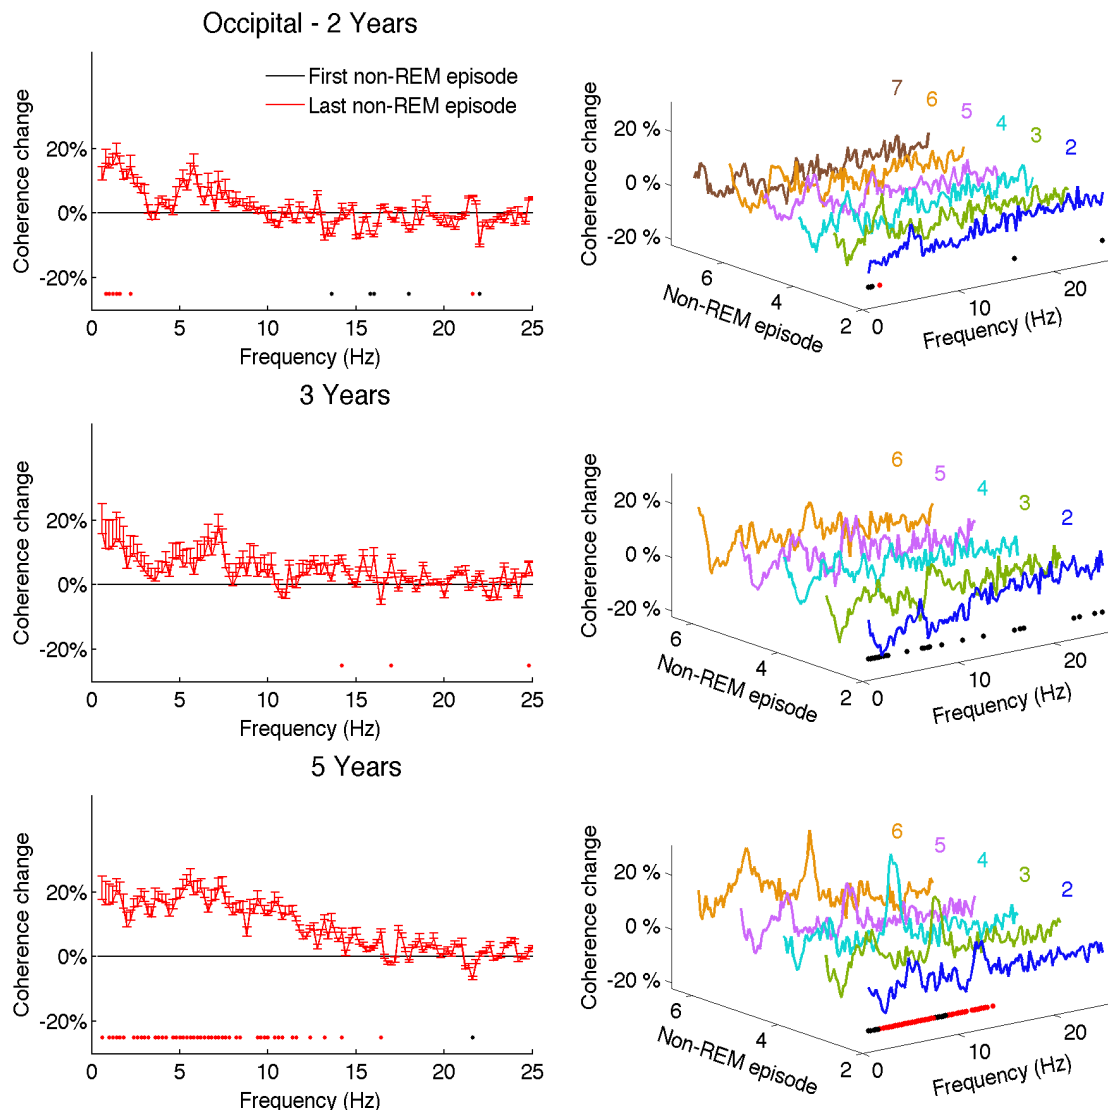

**Figure S2.** Temporal dynamics of inter-hemispheric central coherence across the night. For details see Figure S1.

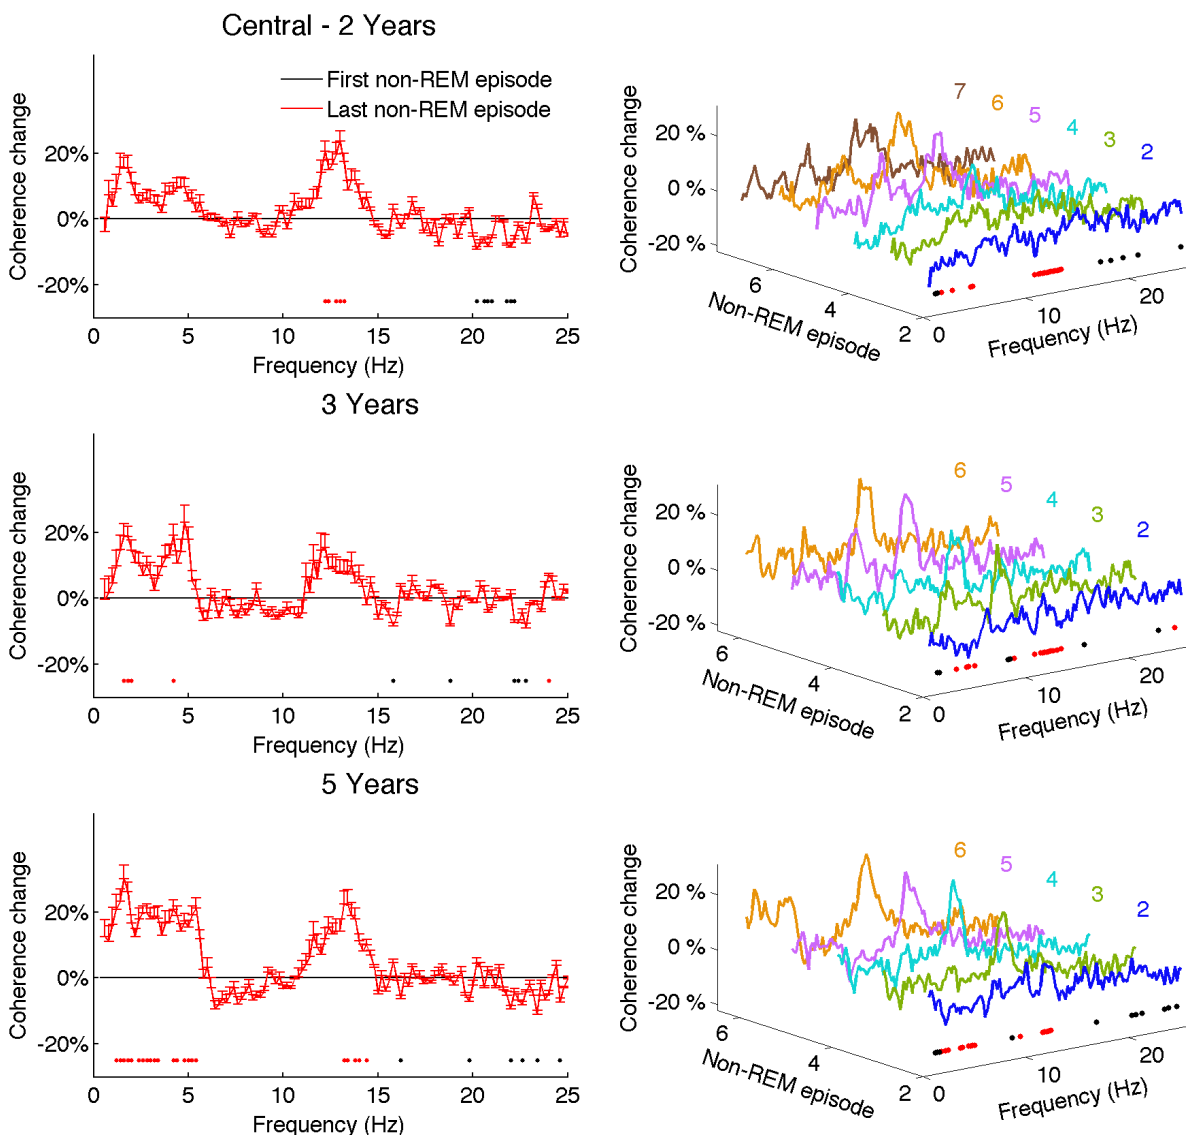

**Figure S3.** Temporal dynamics of intra-hemispheric coherence in the left hemisphere across the night. For details see Figure S1.

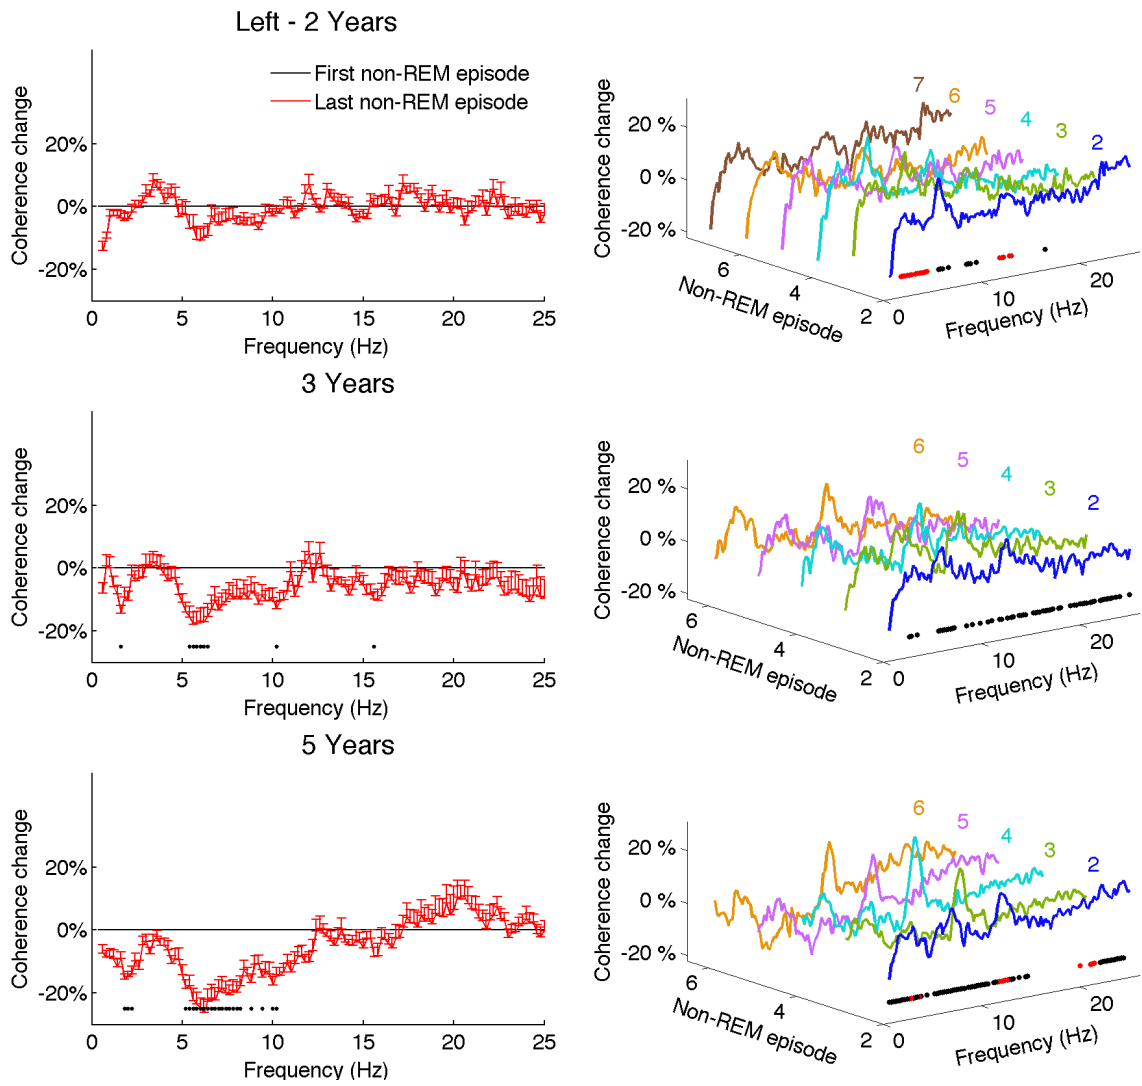

**Figure S4.** Temporal dynamics of intra-hemispheric coherence in the right hemisphere across the night. For details see Figure S1.

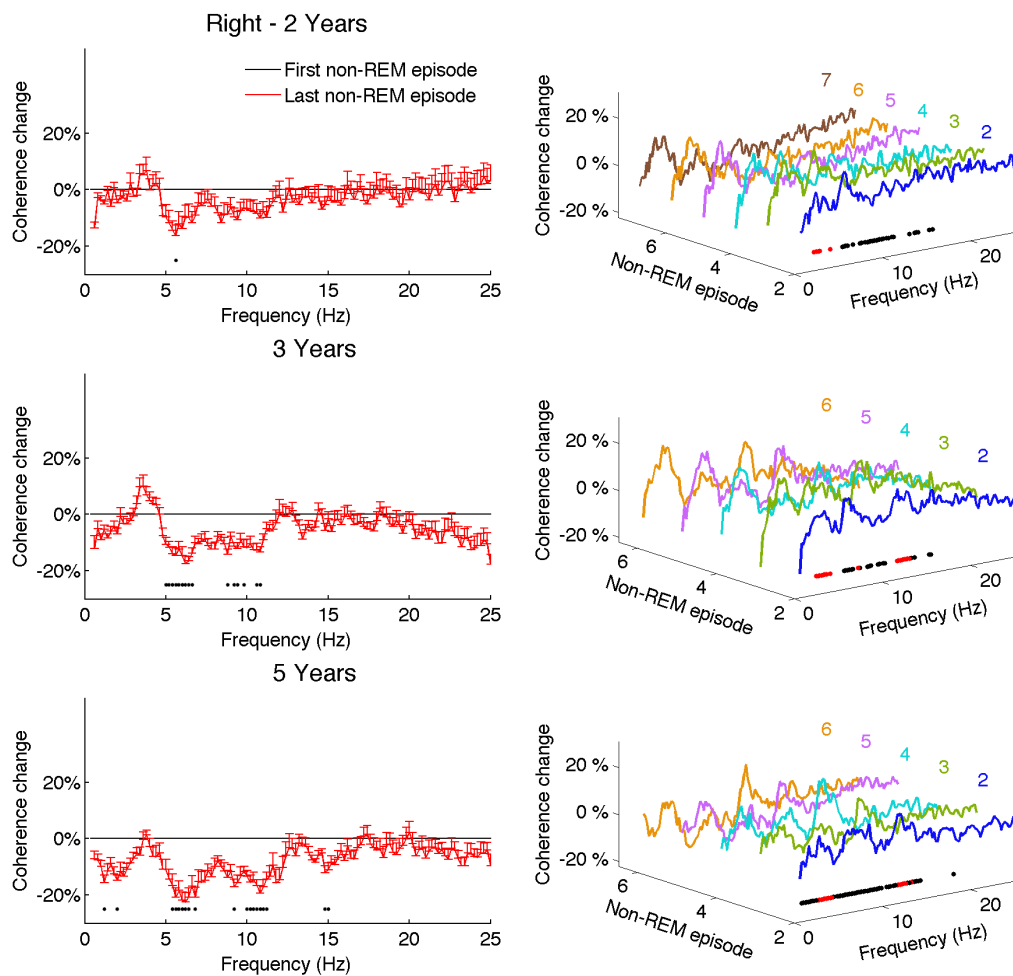

© 2013 by the authors; licensee MDPI, Basel, Switzerland. This article is an open access article distributed under the terms and conditions of the Creative Commons Attribution license (<http://creativecommons.org/licenses/by/3.0/>).
